# Supplementary material for: Cross-species genomics identifies DLG2 as a tumor suppressor in osteosarcoma
Source: PubMed Central journal article supplement (PMC6756098; doi:10.1038/s41388-018-0444-4), 2018-08-09
Supplement: 41388_2018_444_MOESM1_ESM.pdf [file 41388_2018_444_MOESM1_ESM.pdf]

## 1 Supplemental data

### 2 Methods

3 **Cell culture:** U2OS, SAOS-2 and SJSA-1 cells were obtained from ATCC, while HuO-3N1 and  
4 HuO9 were from the RIKEN Institute. Canine OS cell line OVC-cOSA-31 was established in  
5 University of Guelph. Cells were cultured according to the provider's specific protocol. Viable  
6 cell quantifications were done using Celltiter-Glo or hemocytometer.

7 **Real-time PCR:** Genomic DNA was isolated from human osteosarcoma tissues using DNeasy  
8 Mini Kit (Qiagen). Real-time PCR was carried out using Perfecta SYBR Green Super mix  
9 (Quantabio) according to the manufacturer's protocol using Applied Biosystems 7500 PCR  
10 system. Human genomic DNA (Promega) was used as the control sample. The PCR primers used  
11 here were as follows: DLG2-F: 5'-TGTTGAGGATGTGGTGGAGA-3', DLG2-R: 5'-  
12 TTGTACTGGCCGGCTTCTAT-3'; RRP30-F: 5'-GCAAGTAAGTTTCTCCGAATCC-3', RPP30-R: 5'-  
13 GCGCAGAGCCTTCAGGT-3' (internal control). Relative copy number was compared to control,  
14 and calculated as  $2^{-\Delta\Delta CT}$ . Value less than 0.5 was determined as deletion.

15 **Lentiviral transduction:** DLG2 open reading frame expression (EX-Z6752-Lv201) and empty  
16 control clones were obtained from Genecopoeia. Lentivirus was produced using Lenti-Pac HIV  
17 Expression Packaging kit (Genecopoeia). To generate stable cell lines, osteosarcoma cells were  
18 transduced with the indicated lentiviruses (MOI = 10~20) and selected with 1 µg/ml puromycin.

19 **Western blot:** The analysis was performed by standard procedures. Antibodies against DLG2  
20 (1:1000, AB5168-200UL, Millipore) and β-actin (1:1000, #3700, Cell Signaling Technology) were  
21 used. The protein bands were detected by the enhanced chemiluminescence detection system.

22

1 **3D Matrigel colony formation assay:** 200µl of Matrigel (BD Biosciences) was added to each  
2 well of a 24-well tissue culture plate and allowed to solidify for 1 hour at 37°C. 2X10<sup>4</sup> cells were  
3 suspended in 200ul 20% Matrigel in culture medium and seeded onto Matrigel-coated wells in  
4 triplicate. Plates were then incubated at 37 °C for 30 min to allow the Matrigel to solidify, and  
5 culture medium then was added. Cells were allowed to proliferate for 2–3 weeks and to form  
6 colonies. These were imaged and quantified under a phase-contrast microscope.

7 **Scratch-wound and transwell migration assay:** Scratch-wound assays were carried out  
8 according to standard protocols. Cells were cultured for 24 hours to monitor migration. The gap  
9 distance was quantitatively evaluated using Image J software. Transwell migration assays were  
10 carried out on 24-well transwell insert (BD Biosciences), 10% FBS was used as an attractant  
11 and cells were then cultured for 24 hours.

12 **Histology and immunohistochemistry:** Organs or tumor samples were dissected, washed  
13 thoroughly with PBS, fixed with 4% paraformaldehyde (PFA) overnight at 4°C, decalcified in 20%  
14 EDTA (pH 7.4), and then embedded in paraffin. Sections (5 µm) were prepared and stained with  
15 hematoxylin & eosin (H&E) or Masson-Trichrome by Toronto Centre of Phenogenomics (TCP)  
16 pathology laboratory via routine protocols.

17 **Cell cycle analysis by flow cytometry:** BD Pharmingen BrdU Flow Kits and in-house flow  
18 cytometry protocol were followed. Briefly, BrdU was added to cells at a final concentration of  
19 10 µM for 1-3 hours depending on the cell line. Flow cytometry preparation was performed  
20 using standard protocols. Data collection was done on BD Fortessa II and analysis was done  
21 using FlowJo Version 7.65 or Version VX.

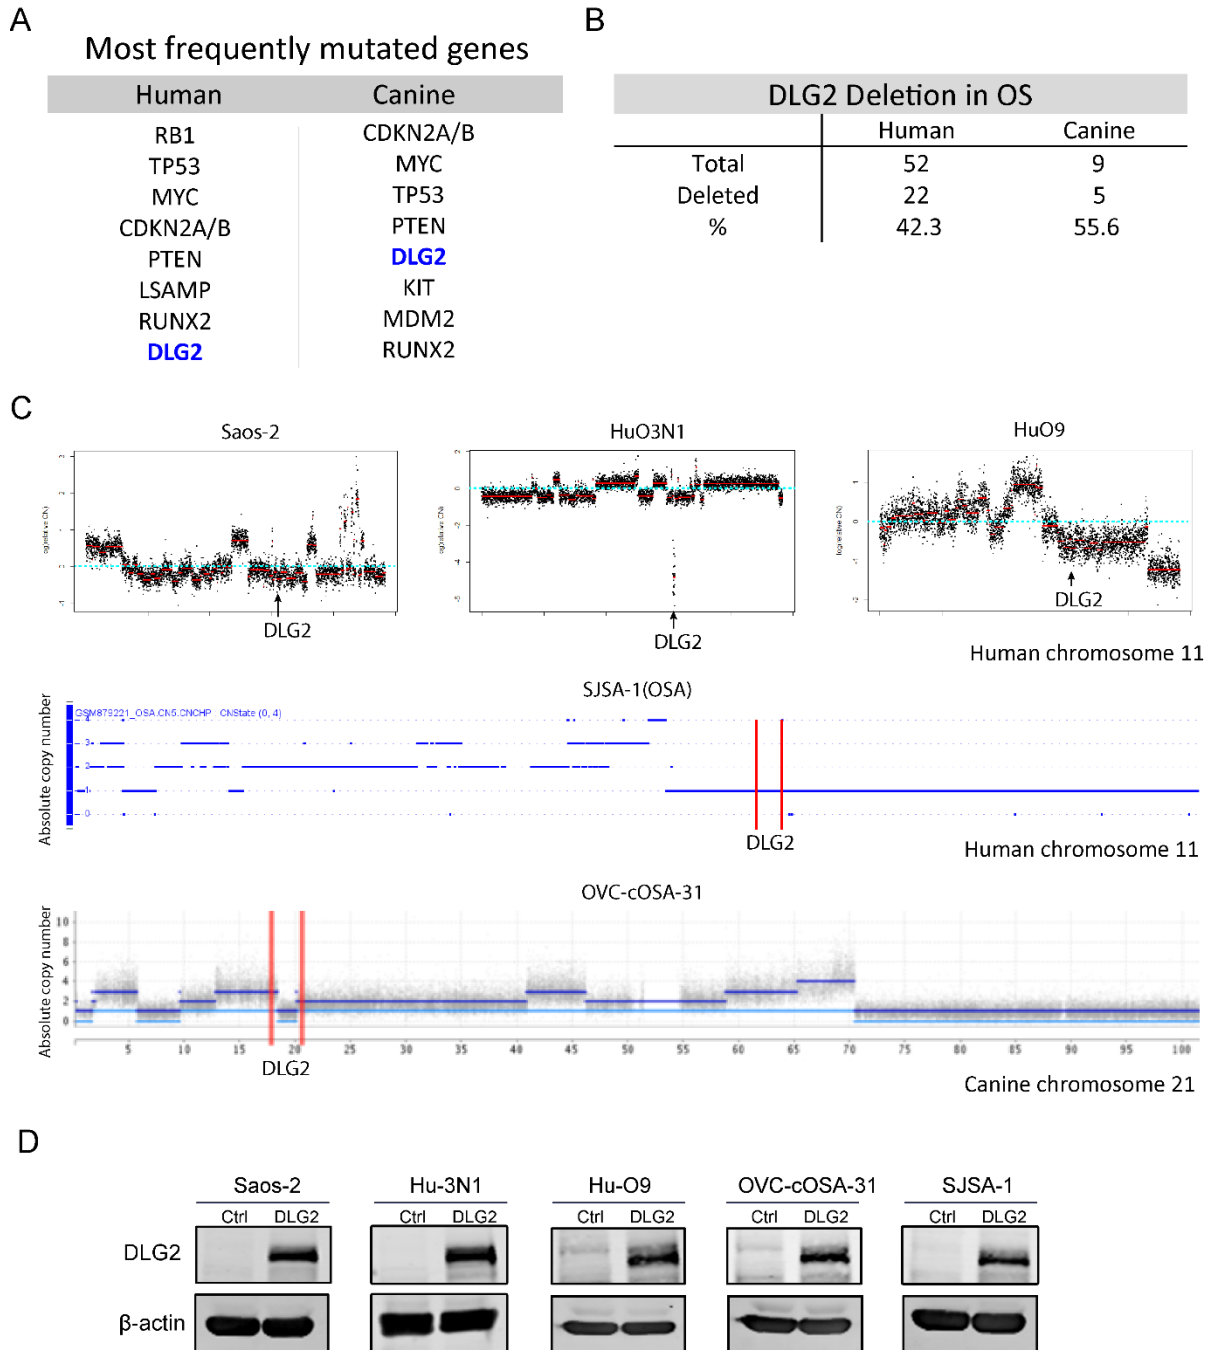

**Supplemental Figure 1.** (A) 6 of the 8 most frequently altered genes in osteosarcoma are common to both human and dog. Note DLG2 is among the top genes in both species. (B) Deletion frequencies of DLG2 in human and canine OS tumors. (C) Copy number profile of human and canine OS cell lines that are selected based on their DLG2 genomic status. Cell lines used in experiments exhibit DLG2 deletion. (D) Western blot analysis of selected cell lines with endogenous (Ctrl) or DLG2 overexpression.

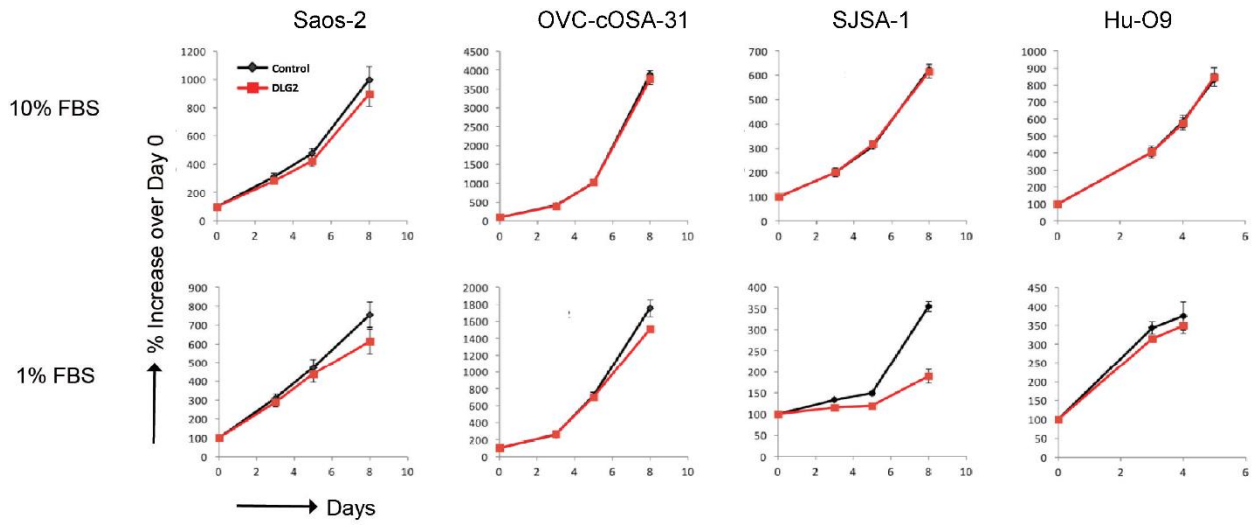

**Supplemental Figure 2.** (A) DLG2 restoration does not induce proliferation changes under 2D culture conditions. Top panel shows cell lines cultured with 10% FBS, bottom panel with 1% FBS.

## Supplemental Table 1

### Clinical features of the breeds of dogs employed in this study

| Sample Number | Breed                                  | Age    | Sex | Survival Time |
|---------------|----------------------------------------|--------|-----|---------------|
| 1             | Rottweiler                             | 7 yrs  | MC  | ~6-7 months   |
| 2             | Mixed Breed (German Shepherd/Collie/X) | 8 yrs  | MC  | ~12 months    |
| 3             | Boxer                                  | 12 yrs | FS  | ~2-4 months   |
| 4             | Mixed Breed (Labrador Retriever/X)     | 10 yrs | FS  | ~4-5 months   |
| 5             | Rottweiler X (Canine Mixed Breed)      | 9 yrs  | FS  | ~7 months     |
| 6             | Greyhound                              | 6 yrs  | MC  | ~11 months    |
| 7             | Bull Mastiff                           | 8 yrs  | MC  | ~6 months     |
| 8             | Great Pyrenees                         | 7 yrs  | FS  | ~13 months    |
| 9             | Great Pyrenees                         | 5 yrs  | MC  | ~5 months     |

## Supplemental Table 2

**DLG2 point mutations in various cancer genomes. Most mutations resulted in amino acid property changes.**

### a. *DLG2* mutations frequency in cancer

| Tumor Type     | # of Samples Analyzed | # of Mutation observed |
|----------------|-----------------------|------------------------|
| Ovary          | 3                     | 3                      |
| Pancreas       | 24                    | 2                      |
| Breast         | 11                    | 0                      |
| Pancreas       | 22                    | 0                      |
| Skin           | 2                     | 2                      |
| Biliary tract  | 2                     | 0                      |
| Upper AG tract | 3                     | 3                      |
| Colon          | 11                    | 0                      |
| CNS            | 22                    | 0                      |
| Total          | 101                   | 11                     |

### b. *DLG2* nonsynonymous mutations in cancer

| mRNA             | Protein | Before      | After       |
|------------------|---------|-------------|-------------|
| c.2075G>A        | p.R692Q | Positive    | Polar       |
| c.2158G>A        | p.E720K | Negative    | Positive    |
| c.962C>T         | p.P321L | Special     | Hybrophobic |
| c.2287A>G        | p.R763G | Positive    | Polar       |
| c.481G>T         | p.V161F | Hybrophobic | Aromatic    |
| c.491G>T         | p.S164I | Polar       | Hydrophobic |
| c.1589_1590CC>TT | p.S530F | Polar       | Aromatic    |

### Supplemental Table 3

#### 167 differentially expressed probes/genes between DLG2 deleted and wild type canine primary tumors

| No. | Probe ID         | Fold change | Symbol  | Name                                               | EntrezID | Accession | p-value  |
|-----|------------------|-------------|---------|----------------------------------------------------|----------|-----------|----------|
| 1   | A_11_P079441     | 0.025       | NPY     | neuropeptide Y                                     | 475257   | XM_532492 | 1.18E-05 |
| 2   | A_11_P0000016871 | 0.025       |         |                                                    |          |           | 0.000299 |
| 3   | A_11_P164793     | 0.032       |         |                                                    |          |           | 2.50E-06 |
| 4   | A_11_P150478     | 0.035       |         |                                                    |          |           | 0.000387 |
| 5   | A_11_P0000016604 | 0.039       |         |                                                    |          |           | 0.000551 |
| 6   | A_11_P0000035706 | 0.048       |         |                                                    |          |           | 0.00028  |
| 7   | A_11_P161333     | 0.058       |         |                                                    |          |           | 0.000341 |
| 8   | A_11_P182068     | 0.066       |         |                                                    |          |           | 0.000472 |
| 9   | A_11_P126441     | 0.068       | FLRT3   | fibronectin leucine rich transmembrane protein 3   | 477149   | XM_534339 | 1.92E-05 |
| 10  | A_11_P120626     | 0.071       |         |                                                    |          |           | 1.60E-06 |
| 11  | A_11_P079656     | 0.076       | LRRN3   | leucine rich repeat neuronal 3                     | 482406   | XM_539523 | 0.000243 |
| 12  | A_11_P0000031395 | 0.093       |         |                                                    |          |           | 0.000394 |
| 13  | A_11_P091981     | 0.1         |         |                                                    |          |           | 4.06E-05 |
| 14  | A_11_P0000023452 | 0.11        | SCG5    | secretogranin V (7B2 protein)                      | 478249   | XM_535423 | 0.000737 |
| 15  | A_11_P0000022534 | 0.11        |         |                                                    |          |           | 1.99E-05 |
| 16  | A_11_P0000042014 | 0.11        |         |                                                    |          |           | 9.20E-05 |
| 17  | A_11_P000009568  | 0.11        |         |                                                    |          |           | 0.000168 |
| 18  | A_11_P0000045    | 0.12        | ENPP2   | ectonucleotide pyrophosphatase/phosphodiesterase 2 | 482026   | XM_539147 | 0.000396 |
| 19  | A_11_P207533     | 0.12        |         |                                                    |          |           | 1.36E-05 |
| 20  | A_11_P156838     | 0.12        |         |                                                    |          |           | 0.0002   |
| 21  | A_11_P134231     | 0.13        | BVES    | blood vessel epicardial substance                  | 481944   | XM_539065 | 8.51E-05 |
| 22  | A_11_P0000039966 | 0.13        |         |                                                    |          |           | 1.70E-06 |
| 23  | A_11_P189798     | 0.13        |         |                                                    |          |           | 2.85E-05 |
| 24  | A_11_P000003463  | 0.13        |         |                                                    |          |           | 0.000126 |
| 25  | A_11_P0000040386 | 0.13        |         |                                                    |          |           | 0.000636 |
| 26  | A_11_P102221     | 0.14        | PCDHB14 | protocadherin beta 14                              | 487175   | XM_844094 | 7.11E-05 |
| 27  | A_11_P067266     | 0.15        |         |                                                    |          |           | 0.00049  |
| 28  | A_11_P0000026871 | 0.16        | GPR85   | G protein-coupled receptor 85                      | 482410   | XM_539527 | 0.000196 |
| 29  | A_11_P183668     | 0.16        |         |                                                    |          |           | 6.93E-05 |
| 30  | A_11_P192748     | 0.16        |         |                                                    |          |           | 0.000383 |
| 31  | A_11_P119191     | 0.17        | GARNL3  | GTPase activating Rap/RanGAP domain-like 3         | 480718   | XM_857841 | 1.34E-05 |
| 32  | A_11_P112196     | 0.17        | TTYH1   | tweety homolog 1 (Drosophila)                      | 476386   | XM_533589 | 1.25E-05 |
| 33  | A_11_P0000016845 | 0.17        |         |                                                    |          |           | 2.21E-05 |
| 34  | A_11_P0000011239 | 0.17        |         |                                                    |          |           | 0.000243 |
| 35  | A_11_P180248     | 0.17        |         |                                                    |          |           | 0.000411 |
| 36  | A_11_P083571     | 0.18        |         |                                                    |          |           | 2.20E-05 |
| 37  | A_11_P137766     | 0.18        |         |                                                    |          |           | 4.57E-05 |

|    |                  |      |           |                                                        |        |              |          |
|----|------------------|------|-----------|--------------------------------------------------------|--------|--------------|----------|
| 38 | A_11_P066316     | 0.18 |           |                                                        |        |              | 0.000365 |
| 39 | A_11_P0000034033 | 0.19 | IGF2BP1   | insulin-like growth factor 2 mRNA binding protein 1    | 491064 | XM_003435261 | 0.000287 |
| 40 | A_11_P210608     | 0.19 | TNNI3     | troponin I type 3 (cardiac)                            | 403566 | NM_001003041 | 0.00022  |
| 41 | A_11_P0000021443 | 0.19 |           |                                                        |        |              | 0.000114 |
| 42 | A_11_P097266     | 0.2  | RBFox1    | RNA binding protein, fox-1 homolog (C. elegans) 1      | 609116 | XM_003434859 | 0.000837 |
| 43 | A_11_P083566     | 0.2  |           |                                                        |        |              | 0.000102 |
| 44 | A_11_P0000023967 | 0.2  |           |                                                        |        |              | 0.00014  |
| 45 | A_11_P051471     | 0.2  |           |                                                        |        |              | 0.000885 |
| 46 | A_11_P0000029082 | 0.21 |           |                                                        |        |              | 0.000104 |
| 47 | A_11_P106986     | 0.21 |           |                                                        |        |              | 0.000246 |
| 48 | A_11_P051506     | 0.21 |           |                                                        |        |              | 0.000528 |
| 49 | A_11_P051466     | 0.21 |           |                                                        |        |              | 0.00092  |
| 50 | A_11_P126166     | 0.22 | LOC484934 | zinc finger protein 709-like                           | 484934 | XM_542050    | 2.36E-05 |
| 51 | A_11_P183013     | 0.22 |           |                                                        |        |              | 3.15E-05 |
| 52 | A_11_P123506     | 0.22 |           |                                                        |        |              | 0.000372 |
| 53 | A_11_P187748     | 0.22 |           |                                                        |        |              | 0.000513 |
| 54 | A_11_P136846     | 0.23 | TRIM37    | tripartite motif containing 37                         | 480575 | XM_537697    | 0.00099  |
| 55 | A_11_P100896     | 0.23 |           |                                                        |        |              | 5.22E-05 |
| 56 | A_11_P0000017143 | 0.23 |           |                                                        |        |              | 0.000995 |
| 57 | A_11_P064171     | 0.24 | TOX       | thymocyte selection-associated high mobility group box | 486964 | XM_544093    | 0.000915 |
| 58 | A_11_P0000019766 | 0.24 |           |                                                        |        |              | 0.000196 |
| 59 | A_11_P0000013952 | 0.24 |           |                                                        |        |              | 0.000146 |
| 60 | A_11_P193928     | 0.24 |           |                                                        |        |              | 0.000347 |
| 61 | A_11_P177133     | 0.24 |           |                                                        |        |              | 0.000453 |
| 62 | A_11_P000002641  | 0.24 |           |                                                        |        |              | 0.000833 |
| 63 | A_11_P0000032744 | 0.24 |           |                                                        |        |              | 0.000867 |
| 64 | A_11_P081231     | 0.25 | RGS9      | regulator of G-protein signaling 9                     | 490902 | XM_548024    | 0.00092  |
| 65 | A_11_P196063     | 0.25 |           |                                                        |        |              | 0.000461 |
| 66 | A_11_P0000017027 | 0.25 |           |                                                        |        |              | 0.00018  |
| 67 | A_11_P109051     | 0.25 |           |                                                        |        |              | 0.00038  |
| 68 | A_11_P0000024127 | 0.25 |           |                                                        |        |              | 0.000768 |
| 69 | A_11_P0000021356 | 0.25 |           |                                                        |        |              | 0.000812 |
| 70 | A_11_P173248     | 0.26 | FKBP4     | FK506 binding protein 4, 59kDa                         | 477726 | XM_534923    | 0.000194 |
| 71 | A_11_P0000026525 | 0.26 | HS3ST5    | heparan sulfate (glucosamine) 3-O-sulfotransferase 5   | 481968 | XM_539089    | 0.000973 |
| 72 | A_11_P0000041559 | 0.26 |           |                                                        |        |              | 0.000118 |
| 73 | A_11_P153568     | 0.26 |           |                                                        |        |              | 0.000138 |
| 74 | A_11_P0000039024 | 0.26 |           |                                                        |        |              | 0.000165 |
| 75 | A_11_P129106     | 0.26 |           |                                                        |        |              | 0.000274 |
| 76 | A_11_P0000039793 | 0.26 |           |                                                        |        |              | 0.000469 |
| 77 | A_11_P127746     | 0.26 |           |                                                        |        |              | 0.000593 |
| 78 | A_11_P0000036794 | 0.26 |           |                                                        |        |              | 0.000881 |
| 79 | A_11_P0000018034 | 0.26 |           |                                                        |        |              | 0.000953 |
| 80 | A_11_P063851     | 0.27 | LHPP      | phospholysine phosphohistidine                         | 486930 | XM_544060    | 0.000158 |



|     |                  |      |         |                                                         |        |              |          |
|-----|------------------|------|---------|---------------------------------------------------------|--------|--------------|----------|
|     |                  |      |         | inorganic pyrophosphate phosphatase                     |        |              |          |
| 81  | A_11_P0000029296 | 0.27 |         |                                                         |        |              | 0.000254 |
| 82  | A_11_P194038     | 0.27 |         |                                                         |        |              | 0.00042  |
| 83  | A_11_P178678     | 0.27 |         |                                                         |        |              | 0.000579 |
| 84  | A_11_P165623     | 0.27 |         |                                                         |        |              | 0.000718 |
| 85  | A_11_P0000022486 | 0.28 | RBP1    | retinol binding protein 1, cellular                     | 477090 | XM_534285    | 0.000117 |
| 86  | A_11_P055691     | 0.29 | LMX1A   | LIM homeobox transcription factor 1, alpha              | 609061 | XM_846259    | 0.000799 |
| 87  | A_11_P0000013025 | 0.29 |         |                                                         |        |              | 1.00E-04 |
| 88  | A_11_P0000017802 | 0.29 |         |                                                         |        |              | 0.000647 |
| 89  | A_11_P109606     | 0.29 |         |                                                         |        |              | 0.000929 |
| 90  | A_11_P0000023052 | 0.3  | HTR7    | 5-hydroxytryptamine receptor 7                          | 477762 | XM_534958    | 0.000571 |
| 91  | A_11_P107231     | 0.3  | NFIA    | nuclear factor I/A                                      | 479552 | XM_536691    | 6.69E-05 |
| 92  | A_11_P109173     | 0.3  | NTRK3   | neurotrophic tyrosine kinase, receptor, type 3          | 609087 | XM_846291    | 0.000979 |
| 93  | A_11_P154218     | 0.3  |         |                                                         |        |              | 0.000179 |
| 94  | A_11_P0000015020 | 0.3  |         |                                                         |        |              | 0.000564 |
| 95  | A_11_P0000024245 | 0.31 | RTKN2   | rhotekin 2                                              | 479218 | XM_536360    | 0.000226 |
| 96  | A_11_P172868     | 0.31 |         |                                                         |        |              | 0.000117 |
| 97  | A_11_P000008616  | 0.31 |         |                                                         |        |              | 0.000265 |
| 98  | A_11_P0000041919 | 0.31 |         |                                                         |        |              | 0.000266 |
| 99  | A_11_P0000041691 | 0.31 |         |                                                         |        |              | 0.000317 |
| 100 | A_11_P207618     | 0.31 |         |                                                         |        |              | 0.000793 |
| 101 | A_11_P113571     | 0.31 |         |                                                         |        |              | 0.000887 |
| 102 | A_11_P0000027232 | 0.32 | DDX43   | DEAD (Asp-Glu-Ala-Asp) box polypeptide 43               | 611029 | XM_848647    | 0.000343 |
| 103 | A_11_P116626     | 0.32 | PCNA    | proliferating cell nuclear antigen                      | 477166 | XM_534355    | 0.00088  |
| 104 | A_11_P181218     | 0.32 |         |                                                         |        |              | 0.000599 |
| 105 | A_11_P098321     | 0.32 |         |                                                         |        |              | 0.000922 |
| 106 | A_11_P0000024788 | 0.33 | ATF7IP2 | activating transcription factor 7 interacting protein 2 | 479852 | XM_536977    | 0.000252 |
| 107 | A_11_P0000019679 | 0.33 |         |                                                         |        |              | 0.000128 |
| 108 | A_11_P000006209  | 0.34 |         |                                                         |        |              | 0.000126 |
| 109 | A_11_P0000011243 | 0.34 |         |                                                         |        |              | 0.000316 |
| 110 | A_11_P055711     | 0.35 | HSD17B7 | hydroxysteroid (17-beta) dehydrogenase 7                | 609364 | XM_846605    | 0.000847 |
| 111 | A_11_P000001652  | 0.35 |         |                                                         |        |              | 0.000238 |
| 112 | A_11_P0000014425 | 0.35 |         |                                                         |        |              | 0.000374 |
| 113 | A_11_P187463     | 0.35 |         |                                                         |        |              | 0.000375 |
| 114 | A_11_P000006343  | 0.35 |         |                                                         |        |              | 0.000552 |
| 115 | A_11_P000003665  | 0.35 |         |                                                         |        |              | 0.000875 |
| 116 | A_11_P0000030689 | 0.36 | HNF4G   | hepatocyte nuclear factor 4, gamma                      | 487005 | XM_003433668 | 0.000925 |
| 117 | A_11_P089591     | 0.36 | MCM5    | minichromosome maintenance complex component 5          | 610519 | XM_848041    | 0.000883 |
| 118 | A_11_P207463     | 0.37 |         |                                                         |        |              | 0.000408 |
| 119 | A_11_P000004813  | 0.37 |         |                                                         |        |              | 0.000857 |
| 120 | A_11_P128496     | 0.38 | TOM1L1  | target of myb1 (chicken)-like 1                         | 491093 | XM_847759    | 0.000761 |
| 121 | A_11_P000005752  | 0.38 |         |                                                         |        |              | 0.000448 |

|     |                  |       |           |                                       |        |              |          |
|-----|------------------|-------|-----------|---------------------------------------|--------|--------------|----------|
| 122 | A_11_P217428     | 0.38  |           |                                       |        |              | 0.000689 |
| 123 | A_11_P0000017227 | 0.38  |           |                                       |        |              | 0.000704 |
| 124 | A_11_P000003008  | 0.38  |           |                                       |        |              | 0.000828 |
| 125 | A_11_P217163     | 0.39  |           |                                       |        |              | 0.000867 |
| 126 | A_11_P0000039429 | 0.4   |           |                                       |        |              | 0.000703 |
| 127 | A_11_P159463     | 0.4   |           |                                       |        |              | 0.000725 |
| 128 | A_11_P0000011879 | 0.4   |           |                                       |        |              | 0.00088  |
| 129 | A_11_P0000028408 | 0.41  | EPS8L1    | EPS8-like 1                           | 484302 | XM_541418    | 0.000601 |
| 130 | A_11_P0000038562 | 0.41  |           |                                       |        |              | 0.000441 |
| 131 | A_11_P174643     | 0.42  |           |                                       |        |              | 0.000675 |
| 132 | A_11_P176368     | 0.44  |           |                                       |        |              | 0.000838 |
| 133 | A_11_P058421     | 3.13  |           |                                       |        |              | 0.000877 |
| 134 | A_11_P0000019663 | 3.17  | CD8A      | CD8a molecule                         | 403157 | NM_001002935 | 0.000419 |
| 135 | A_11_P050776     | 3.25  |           |                                       |        |              | 0.000839 |
| 136 | A_11_P0000020101 | 3.28  | CCL4      | chemokine (C-C motif) ligand 4        | 448786 | NM_001005250 | 0.000931 |
| 137 | A_11_P058996     | 3.65  | CXCL13    | chemokine (C-X-C motif) ligand 13     | 608156 | XM_845089    | 0.000616 |
| 138 | A_11_P114341     | 4.05  | DMD       | dystrophin                            | 606758 | NM_001003343 | 0.000736 |
| 139 | A_11_P094216     | 4.74  |           |                                       |        |              | 0.000654 |
| 140 | A_11_P0000024409 | 5.72  |           |                                       |        |              | 0.000599 |
| 141 | A_11_P094241     | 7.73  |           |                                       |        |              | 0.000373 |
| 142 | A_11_P0000030842 | 7.84  | GZMA      | granzyme A                            | 487207 | XM_544335    | 1.80E-06 |
| 143 | A_11_P094231     | 8.11  | LOC607543 | Ig heavy chain V-III region VH26-like | 607543 |              | 0.000316 |
| 144 | A_11_P0000025562 | 8.14  |           |                                       |        |              | 0.000828 |
| 145 | A_11_P196708     | 15.79 |           |                                       |        |              | 0.000952 |
| 146 | A_11_P054741     | 18.6  |           |                                       |        |              | 0.000472 |
| 147 | A_11_P060756     | 19.45 |           |                                       |        |              | 9.10E-06 |
| 148 | A_11_P101211     | 22.41 |           |                                       |        |              | 0.000395 |
| 149 | A_11_P054732     | 23.07 |           |                                       |        |              | 0.000826 |
| 150 | A_11_P145753     | 23.2  |           |                                       |        |              | 0.000136 |
| 151 | A_11_P000001229  | 24.7  |           |                                       |        |              | 0.000823 |
| 152 | A_11_P054921     | 26.65 |           |                                       |        |              | 0.000184 |
| 153 | A_11_P060584     | 26.69 | LOC612135 | uncharacterized LOC612135             | 612135 |              | 0.000828 |
| 154 | A_11_P060571     | 28.87 | LOC612122 | uncharacterized LOC612122             | 612122 | XM_849848    | 0.000333 |
| 155 | A_11_P053591     | 31.26 |           |                                       |        |              | 9.13E-05 |
| 156 | A_11_P060626     | 31.4  | LOC491494 | Ig lambda chain V region 4A-like      | 491494 |              | 0.000518 |
| 157 | A_11_P054646     | 32.85 |           |                                       |        |              | 0.000646 |
| 158 | A_11_P060611     | 32.96 |           |                                       |        |              | 0.000272 |
| 159 | A_11_P138911     | 33.61 |           |                                       |        |              | 0.00024  |
| 160 | A_11_P0000022913 | 34.85 |           |                                       |        |              | 0.000251 |
| 161 | A_11_P094171     | 35.59 |           |                                       |        |              | 0.000267 |
| 162 | A_11_P060656     | 35.72 | LOC486384 | Ig kappa chain V region Mem5-like     | 486384 |              | 0.000655 |
| 163 | A_11_P054726     | 37.62 |           |                                       |        |              | 0.000721 |
| 164 | A_11_P060716     | 38.31 | LOC607200 | Ig lambda chain V-I region BL2-like   | 607200 |              | 5.10E-05 |
| 165 | A_11_P054711     | 39.59 |           |                                       |        |              | 0.000186 |

|     |              |       |  |  |  |  |          |
|-----|--------------|-------|--|--|--|--|----------|
| 166 | A_11_P054596 | 44.45 |  |  |  |  | 0.000135 |
| 167 | A_11_P054606 | 51.61 |  |  |  |  | 0.000181 |
